# Supplementary material for: Distinct Molecular Profiles and Drug Vulnerabilities in Pancreatic Metastases of Renal Cell Carcinoma
Source: Research Square preprint supplement (doi:10.21203/rs.3.rs-3375800/v1), 2023-10-19
Supplement: Supplementary file 1 [file 861fd9ca641a36d4e73faecc.xlsx]

## Sheet: Table_S1a
​	Pt 1​	Pt 2 ​	Pt 3​	Pt 4​	Pt 5​
Sex​	Male​	Male​	Female​	Female​	Male​
Years since PT​	6​	15​	6​	17​	7​
PT grade​ (WHO/ISUP)	II​	II​	IV​	II​	?​
PT location​	Sin​	Sin​	Sin​	Dx​	Sin​
Treatment​	-​	Interferon-velbe​	Sunitinib​	-​	-​
Other metastases​ before PM		Lung and liver	Lung	​	​
Other metastases​ after PM	Lymph nodes (mediastinal)	Lymph nodes (pelvic)			Pancreas
PFS (months) after PM	12	17	31	28	22

## Sheet: Table_S1b
Patient	Gene	Transcript	Cancer somatic mutation	Amino Acid Change	Tumor Var. Freq	2D PDC Var. Freq	TCDA Druggable Gene Atlas*)	Target Development/druggability level	Tractability (Small molecule)	Tractability (antibody)
Pt 1	VHL	NM_000551	nonsynonymous	exon1:c.T240A:p.S80R	0.667	0.988
	PBRM1	NM_001350075	frameshift deletion	exon23:c.3580_3610del:p.P1194Mfs*14	0.509	1
	SETD2	NM_001349370	frameshift insertion	exon2:c.676dupA:p.I226Nfs*4	0.672	0.973	**	Tchem	Discovery Precedence
	PIEZO2	NM_022068	nonsynonymous	exon46:c.A7280C:p.K2427T	0.251	0.375
	PNPLA7	NM_152286	nonsynonymous	exon16:c.C1796T:p.A599V	0.273	0.529
	DNAH8	NM_001371	nonsynonymous	exon44:c.G5675C:p.G1892A	0.083	0.264
	SETBD1	NM_001145415	nonsynonymous	exon20:c.C3469T:p.R1157C	0.034	NA	*	Tbio	Discovery Precedence	Predicted Tractable - High confidence
	RARRES1	NM_002888	nonsynonymous	exon4:c.G596T:p.S199I	0.148	0.22
Pt 2	MTOR	NM_004958	nonsynonymous	exon53:c.T7280A:p.L2427Q	0.2	0.235	***	Tclin	Clinical Precendence
	MTOR	NM_004958	nonsynonymous	exon9:c.T1319G:p.L440R	0.078	0.314	***	Tclin	Clinical Precendence
	SLC7A14	NM_020949	nonsynonymous	exon7:c.C1888T:p.P630S	0.107	NA	(*)	Tdark	N/A	Predicted Tractable - Medium to low confidence
	URI1	NM_003796	nonsynonymous	exon11:c.T1546G:p.S516A	0.133	NA
Pt 3	VHL	NM_198156	nonsynonymous	exon2:c.T428C:p.L143P	0.266	0.247
	BAP1	NM_004656	frameshift deletion	exon13:c.1514_1530del:p.S505Yfs*26	0.205	0.187	*	Tbio	N/A
	TP53	NM_001126115	nonsynonymous	exon1:c.G128A:p.R43H	0.275	0.22	**	Tchem	Discovery Precedence
	FAT3	NM_001008781	nonsynonymous	exon9:c.C5542A:p.H1848N	0.105	0.074	*	Tbio	N/A	Predicted Tractable-Medium to low confidence
	ZNF256	NM_005773	nonsynonymous	exon3:c.C1076G:p.S359C	0.108	0.118
	ITGAX	NM_000887	nonsynonymous	exon14:c.T1583C:p.L528P	0.31	0.242	*	Tbio	N/A	Predicted Tractable-High Confidence
	ITGAX	NM_000887	nonsynonymous	exon14:c.T1590A:p.D530E	0.3	0.234	*	Tbio	N/A	Predicted Tractable-High Confidence
	ITGAX	NM_000887	nonsynonymous	exon14:c.T1592A:p.V531E	0.303	0.232	*	Tbio	N/A	Predicted Tractable-High Confidence
	DNAH8	NM_001371	nonsynonymous	exon16:c.C1633A:p.P545T	0.205	0.243
	STAG2	NM_006603	nonsynonymous	exon9:c.A862G:p.I288V	0.192	0.15
	UBA7	NM_003335	stopgain	exon10:c.C1164A:p.Y388X	0.312	0.312
	KIF14	NM_001305792	frameshift deletion	exon9:c.541delA:p.T181Lfs*3	0.15	0.238
	KAT6B	NM_001370135	nonsynonymous	exon10:c.C2599T:p.P867S	0.256	0.184	*	Tbio	N/A
	CPOX	NM_000097	nonsynonymous	exon5:c.C991T:p.R331W	0.013	NA
	ABCD1	NM_000033	nonsynonymous	exon6:c.C1552T:p.R518W	0.06	NA	*	Tbio	N/A	Predicted Tractable - Medium to low confidence
	IRF4	NM_001195286	nonsynonymous	exon9:c.A1233C:p.Q411H	0.091	0.082
	WNT1	NM_005430	nonsynonymous	exon4:c.T1109C:p.L370P	0.121	0.059	*	Tbio	N/A	Predicted Tractable - High confidence
	TFPI2	M_001271003	nonsynonymous	exon3:c.G380A:p.R127K	0.152	0.173	*	Tbio	N/A	Predicted Tractable - High confidence
Pt 4	VHL	NM_198156	frameshift deletion	exon2:c.347delC:p.T116Ifs*2	0.516	0.5
	PBRM1	NM_001350075	stopgain	exon4:c.A304T:p.K102X	0.52	0.519
	SETD2	NM_001349370	stopgain	exon11:c.G5782T:p.E1928X	0.333	0.515
	ABCA13	NM_152701	frameshift insertion	exon17:c.5458_5459insTTGTTTT:p.P1820Lfs*43	0.231	0.22	*	Tbio	Predicted Tractable	Predicted Tractable-High Confidence
	ABCA13	NM_152701	frameshift insertion	exon17:c.5460dupT:p.V1821Cfs*40	0.195	0.172	*	Tbio	Predicted Tractable	Predicted Tractable-High Confidence
	CSMD3	NM_001363185	nonsynonymous	exon58:c.C9290T:p.P3097L	0.036	NA
	CSMD3	NM_001363185	nonsynonymous	exon58:c.C9289T:p.P3097S	0.036	NA
	ZNF469	NM_001367624	nonsynonymous	exon1:c.C5484A:p.S1828R	0.246	0.308
	ZNF469	NM_001367624	nonsynonymous	exon1:c.C5485A:p.H1829N	0.244	0.311
	MYH11	NM_002474	nonsynonymous	exon12:c.G1327A:p.A443T	0.268	0.382
	LAMA5	NM_005560	stopgain	exon72:c.C9925T:p.Q3309X	0.134	0.163	*	Tbio	N/A	Predicted Tractable-High Confidence
	MYCBP2	NM_015057	stopgain	exon15:c.G2245T:p.E749X	0.155	0.169
	APC	NM_001127511	frameshift insertion	exon14:c.6519dupA:p.V2176Sfs*3	0.272	0.418
	ARID2	NM_001347839	nonsynonymous	exon15:c.G3173A:p.S1058N	0.101	0.121
	IKZF1	NM_001220768	stopgain	exon3:c.C314A:p.S105X	0.133	0.129
	ERCC2	NM_001130867	nonsynonymous	exon6:c.C499G:p.P167A	0.282	0.324
	ZFX	NM_001178086	stopgain	exon5:c.G469T:p.E157X	0.157	0.168
	CHD1L	NM_001256338	nonframeshift insertion		0.028	NA
Pt 5	VHL	NM_000551	frameshift deletion	exon1:c.297delA:p.T100Rfs*59	0.519	0.795
	VHL	NM_000551	nonsynonymous	exon1:c.A298C:p.T100P	0.532	0.786
	PBRM1	NM_001350075	frameshift insertion	exon17:c.2480dupA:p.N828Efs*3	0.548	0.864
	SETD2	NM_001349370	frameshift deletion	exon2:c.4103_4106del:p.E1368Vfs*19	0.532	0.809	**	Tchem	Discovery Precedence
	MTOR	NM_004958	nonsynonymous	exon29:c.T4298C:p.L1433S	0.459	0.697	***	Tclin	Clinical Precendence
	DST	NM_015548	nonsynonymous	exon41:c.T6865C:p.S2289P	0.468	0.512	*	Tbio	N/A	Predicted Tractable-Medium to low confidence
	MUC16	NM_024690	nonsynonymous	exon1:c.G7375T:p.V2459F	0.35	0.385	*	Tbio	NN/A	Clinical Precendence
	ZNF256	NM_005773	nonsynonymous	exon3:c.C1192T:p.R398W	0.035	0.024
	PNPLA7	NM_152286	nonsynonymous	exon13:c.G1276A:p.E426K	0.392	0.6
	MYH11	NM_002474	nonsynonymous	exon12:c.G1346A:p.R449Q	0.212	0.278
	LAMA5	NM_005560	nonsynonymous	exon65:c.G8854C:p.A2952P	0.164	0.262	*	Tbio	N/A	Predicted Tractable-High Confidence
	ITGAX	NM_000887	nonsynonymous	exon15:c.G1841A:p.R614K	0.174	0.358	*	Tbio	N/A	Predicted Tractable-High Confidence
	ANO3	NM_001313727	nonsynonymous	exon18:c.A1672C:p.I558L	0.313	0.508
	SRSF6	NM_006275	nonsynonymous	exon6:c.T775C:p.S259P	0.409	0.496
	SYNE2	NM_015180	stopgain	exon41:c.T6053A:p.L2018X	0.195	0.306
	SOX6	NM_001145811	nonsynonymous	exon14:c.T1987C:p.Y663H	0.318	0.444
	TMEFF2	NM_001305134	nonsynonymous	exon1:c.C149A:p.T50K	0.286	0.192	*	Tbio	N/A	Predicted Tractable - Medium to low confidence
	SETD1B	NM_001353345	frameshift deletion	exon5:c.796delC:p.N267Tfs*40	0.305	0.369	*	Tbio	N/A
	NRAS	NM_002524	nonsynonymous	exon4:c.C391T:p.H131Y	0.376	0.517
	SENP2	NM_021627	nonsynonymous	exon15:c.C1570G:p.L524V	0.111	0.369
	ZNF703	NM_025069	nonsynonymous	exon2:c.C1298G:p.A433G	0.031	NA
	TES	NM_015641	nonsynonymous	exon3:c.T278A:p.I93K	0.508	0.528

## Sheet: Table_S1c
PCGR biomarker annotations
	SYMBOL	PROTEIN_CHANGE	CANCER_TYPE	EVIDENCE_LEVEL	CLINICAL_SIGNIFICANCE	EVIDENCE_TYPE	THERAPEUTIC_CONTEXT
pt 3	VHL	p.Leu184Pro	Clear Cell Renal Cell Carcinoma	C: Case study	Positive	Diagnostic
pt 3	VHL	p.Leu184Pro	Renal Cell Carcinoma	C: Case study	Positive	Diagnostic
pt 3	TP53	p.Arg175His	Stomach Carcinoma	C: Case study	Sensitivity/Response	Predictive	EAP Protocol
pt 3	TP53	p.Arg175His	Cancer	D: Preclinical evidence	Resistance	Predictive	MDM2 Inhibitor AMGMDS3
pt 3	TP53	p.Arg175His	Breast Cancer	D: Preclinical evidence	Sensitivity/Response	Predictive	Doxorubicin
pt 3	TP53	p.Arg175His	Cancer	D: Preclinical evidence	Sensitivity	Predictive	HSP90 inhibitors
pt 3	TP53	p.Arg175His	Breast Cancer	B: Clinical evidence	Poor Outcome	Prognostic
MTBP biomarker annotations
	SYMBOL	PROTEIN_CHANGE	CANCER_TYPE	EVIDENCE_LEVEL	CLINICAL_SIGNIFICANCE	EVIDENCE_TYPE	THERAPEUTIC_CONTEXT
pt 1	VHL	p.Ser80Arg	Renal Cell Carcinoma	Tier 2 - Investigational	Sensitivity/Response	Predictive	Everolimus
pt 1	VHL	p.Ser80Arg	Renal Cell Carcinoma	Tier 2 - Investigational	Resistance	Predictive	Anti-VEGF Monoclonal Antibody
pt 1	VHL	p.Ser80Arg	Clear Cell Renal Cell Carcinoma	Tier 2 - Investigational	Better Outcome	Prognostic
pt 2	MTOR	p.Leu2427Gln	Renal Cell Carcinoma	Tier 2 - Investigational	Sensitivity/Response	Predictive	Temsirolimus
pt 2	MTOR	p.Leu2427Gln	Bladder Carcinoma	Tier 3 - Cancer repurposing	Sensitivity/Response	Predictive	Everolimus, Pazopanib
pt 2	MTOR	p.Leu2427Gln	Solid Cancer	Tier 4 - Hypothetical	Sensitivity/Response	Predictive	Everolimus
pt 2	MTOR	p.Leu2427Gln	Solid Cancer	Tier 4 - Hypothetical	Sensitivity/Response	Predictive	Temsirolimus
pt 3	TP53	p.Arg175His	Cancer	Tier 4 - Hypothetical	Resistance	Predictive	MDM2 Inhibitor AMGMDS3
pt 3	VHL	p.Leu184Pro	Renal Cell Carcinoma	Tier 2 - Investigational	Sensitivity/Response	Predictive	Everolimus
pt 3	VHL	p.Leu184Pro	Renal Cell Carcinoma	Tier 2 - Investigational	Resistance	Predictive	Anti-VEGF Monoclonal Antibody
pt 3	VHL	p.Leu184Pro	Clear Cell Renal Cell Carcinoma	Tier 2 - Investigational	Better Outcome	Prognostic
pt 4	VHL	p.Thr157IlefsTer2	Renal Cell Carcinoma	Tier 2 - Investigational	Sensitivity/Response	Predictive	Everolimus
pt 4	VHL	p.Thr157IlefsTer2	Renal Cell Carcinoma	Tier 2 - Investigational	Resistance	Predictive	Anti-VEGF Monoclonal Antibody
pt 4	VHL	p.Thr157IlefsTer2	Clear Cell Renal Cell Carcinoma	Tier 2 - Investigational	Better Outcome	Prognostic
pt 5	VHL	p.Thr100ArgfsTer59	Renal Cell Carcinoma	Tier 2 - Investigational	Sensitivity/Response	Predictive	Everolimus
pt 5	VHL	p.Thr100ArgfsTer59	Renal Cell Carcinoma	Tier 2 - Investigational	Resistance	Predictive	Anti-VEGF Monoclonal Antibody
pt 5	VHL	p.Thr100ArgfsTer59	Clear Cell Renal Cell Carcinoma	Tier 2 - Investigational	Better Outcome	Prognostic
pt 5	MTOR	p.Leu1433Ser	Bladder Carcinoma	Tier 3 - Cancer repurposing	Sensitivity/Response	Predictive	Pazopanib,Everolimus
pt 5	MTOR	p.Leu1433Ser	Solid Cancer	Tier 4 - Hypothetical	Sensitivity/Response	Predictive	Everolimus
pt 5	MTOR	p.Leu1433Ser	Solid Cancer	Tier 4 - Hypothetical	Sensitivity/Response	Predictive	Temsirolimus

## Sheet: Table_S1d
patient	gene_mutated	functional_relevance	VAF_in_WES	vartrix_genotype	vartrix_cells_called	vartrix_probability_to_miss_mutation_given_vaf_and_cells_called
pt1	VHL	functional & clinical	0.667	WT_and_mut	40	0
pt1	SETD2	functional	0.672	WT_and_mut	66	0
pt1	PBRM1	functional	0.509	WT_and_mut	6	0.014
pt1	RARRES1	functional	0.148	WT_and_mut	34	0.004
p1	SETDB1	functional	0.034	all_WT	9	0.733
pt2	MTOR	functional & clinical	0.2	WT_and_mut	3	0.512
pt2	URI1	functional	0.133	WT_and_mut	5	0.49
pt2	MTOR	functional & clinical	0.078	all_WT	1	0.922
pt2	SLC7A14	functional	0.107	all_WT	1	0.893
pt3	KIF14	functional	0.15	WT_and_mut	7	0.321
pt3	KAT6B	functional	0.256	WT_and_mut	3	0.412
pt3	TP53	functional & clinical	0.275	WT_and_mut	15	0.008
pt3	VHL	functional & clinical	0.266	WT_and_mut	7	0.115
pt3	TFPI2	functional	0.152	WT_and_mut	67	0
pt3	CPOX	functional	0.013	all_WT	3	0.962
pt3	STAG2	functional	0.192	all_WT	5	0.344
pt4	ARID2	functional	0.101	WT_and_mut	6	0.528
pt4	VHL	functional & clinical	0.516	WT_and_mut	10	0.001
pt4	SETD2	functional	0.333	WT_and_mut	16	0.002
pt4	PBRM1	functional	0.52	all_mut	7	0.006
pt4	APC	functional	0.272	WT_and_mut	4	0.281
pt4	ZFX	functional	0.157	WT_and_mut	82	0
pt4	CHD1L	functional	0.028	all_WT	23	0.52
pt4	MYCBP2	functional	0.155	all_WT	10	0.186
pt4	MYH11	-	0.268	all_WT	2	0.536
pt4	ERCC2	functional	0.282	all_WT	1	0.718
pt4	LAMA5	functional	0.134	all_WT	1	0.866
pt5	MTOR	functional & clinical	0.459	all_mut	1	0.541
pt5	NRAS	functional	0.376	WT_and_mut	14	0.001
pt5	SYNE2	functional	0.195	WT_and_mut	13	0.06
pt5	VHL	functional & clinical	0.519	WT_and_mut	7	0.006
pt5	VHL	functional & clinical	0.532	WT_and_mut	7	0.005
pt5	SETD2	functional	0.532	WT_and_mut	20	0
pt5	PBRM1	functional	0.548	WT_and_mut	49	0
pt5	SENP2	functional	0.111	WT_and_mut	4	0.625
pt5	DST	-	0.468	WT_and_mut	35	0
pt5	SRSF6	functional	0.409	WT_and_mut	38	0
pt5	TES	functional	0.508	WT_and_mut	29	0
pt5	MYH11	-	0.212	all_WT	1	0.788
pt5	ZNF256	-	0.035	all_WT	1	0.965
pt5	ZNF703	functional	0.031	all_WT	1	0.969

## Sheet: Table_S1e
ID	DRUG_NAME	EC50	GRAPH (Pt1)	DSS	EC50	GRAPH (Pt2)	DSS	EC50	GRAPH (pt3)	DSS	EC50	GRAPH (Pt4)	DSS	EC50	GRAPH (Pt5)	DSS	Mechanism/Targets	Class.explained	High.phase/Approval.status	ID	DRUG_NAME	ID	DRUG_NAME
FIMM109453	4-hydroxytamoxifen	10000		0	3133.4		2.3	3301.4		3.1	2495.3		1.6	10000		0	Selective estrogen receptor modulator	F. Hormone therapy	Investigational as a gel preparation	FIMM109453	4-hydroxytamoxifen	FIMM109453	4-hydroxytamoxifen
FIMM136520	ABC294640	50000		0.2	18539.3		2.2	10894.6		4.9	9610		4.4	13253.9		1.7	Sphingosine kinase 2 inhibitor	B. Kinase inhibitor	Investigational (Ph 2)	FIMM136520	ABC294640	FIMM136520	ABC294640
FIMM003716	Abiraterone	5000		0	5000		0	5000		0	5000		0	5000		0	P450 17alpha-hydroxylase-17,20-lyase inhibitor	F. Hormone therapy	Approved	FIMM003716	Abiraterone	FIMM003716	Abiraterone
FIMM003710	Afatinib	1000		0.9	1000		0	12.9		12.4	1000		0.8	1000		0	EGFR inhibitor	B. Kinase inhibitor	Approved	FIMM003710	Afatinib	FIMM003710	Afatinib
FIMM003725	Alvocidib	10000		0	170.8		11.7	177.2		19.7	167.5		11.4	165.8		5.9	CDK inhibitor	B. Kinase inhibitor	Investigational (Ph 2)	FIMM003725	Alvocidib	FIMM003725	Alvocidib
FIMM000360	Aminoglutethimide	10000		0	10000		0	10000		0	10000		0	10000		0	Anti-steroid, aromatase inhibitor	F. Hormone therapy	Approved	FIMM000360	Aminoglutethimide	FIMM000360	Aminoglutethimide
FIMM000171	Anagrelide	10000		0	10000		2.6	10000		0	2077.6		2.6	10000		0	PDE-3, PLA2 inhibitor	X. Other	Approved	FIMM000171	Anagrelide	FIMM000171	Anagrelide
FIMM000303	Anastrozole	10000		0	10000		0	10000		0	10000		0	10000		0	Aromatase inhibitor	F. Hormone therapy	Approved	FIMM000303	Anastrozole	FIMM000303	Anastrozole
FIMM003778	Axitinib	1000		0	1658.9		1.8	10000		0.4	10000		0.5	10000		0	VEGFR, PDGFR, KIT inhibitor	B. Kinase inhibitor	Approved	FIMM003778	Axitinib	FIMM003778	Axitinib
FIMM003741	AZD7762	1000		0	79.1		2.8	184.6		2.9	145.3		3	1000		0.4	Chk1 inhibitor	B. Kinase inhibitor	Investigational (Ph 1)	FIMM003741	AZD7762	FIMM003741	AZD7762
FIMM003743	AZD8055	42.3		6.9	85.2		11.1	51.8		18.1	57.6		12.5	10000		3.3	mTOR inhibitor	B. Kinase inhibitor	Investigational (Ph 1)	FIMM003743	AZD8055	FIMM003743	AZD8055
FIMM000304	Bicalutamide	10000		0	10000		0	10000		1.2	10000		0	10000		0	Nonsteriodal antiandrogen	F. Hormone therapy	Approved	FIMM000304	Bicalutamide	FIMM000304	Bicalutamide
FIMM003745	Bimatoprost	5500		0	5500		0	5500		0	5500		0	5500		0	Prostaglandin analog	D. Immunomodulatory	Approved	FIMM003745	Bimatoprost	FIMM003745	Bimatoprost
FIMM003749	BMS-754807	42.9		8.3	62.3		8.4	605.9		9.3	211.7		10.9	1555.3		3.5	IGF1R inhibitor	B. Kinase inhibitor	Investigational (Ph 2)	FIMM003749	BMS-754807	FIMM003749	BMS-754807
FIMM003780	Bosutinib	519.5		5.6	1492.2		6.9	1422.8		6.7	1229.4		5.3	202.5		3.7	Abl, Src inhibitor	B. Kinase inhibitor	Approved	FIMM003780	Bosutinib	FIMM003780	Bosutinib
FIMM100387	Brivanib	100		0	1000		0	1000		0	1000		0	1000		0	VEGFR inhibitor	B. Kinase inhibitor	Investigational (Ph 3)	FIMM100387	Brivanib	FIMM100387	Brivanib
FIMM100388	Buparlisib	1385.4		3.8	1472.6		5	1413.6		6.7	1235.3		4.9	3324.4		1.5	PI3K inhibitor, pan-class I	B. Kinase inhibitor	Investigational (Ph 2)	FIMM100388	Buparlisib	FIMM100388	Buparlisib
FIMM136469	Cabazitaxel	1000		0	8.8		7.2	1.9		14.6	4.7		8.4	1000		1.4	Taxane microtubule stabilizer, antimitotic	A. Conv. Chemo	Approved	FIMM136469	Cabazitaxel	FIMM136469	Cabazitaxel
FIMM100395	Cabozantinib	1000		0	1000		0.6	1000		0	1000		0	1000		0	VEGFR2, Met, FLT3, Tie2, Kit and Ret inhibitor	B. Kinase inhibitor	Approved	FIMM100395	Cabozantinib	FIMM100395	Cabozantinib
FIMM003781	Canertinib	1518.4		2.8	761.1		3.7	533.9		14.1	696.7		6.4	1139.3		2.2	pan-HER inhibitor	B. Kinase inhibitor	Investigational (Ph 3)	FIMM003781	Canertinib	FIMM003781	Canertinib
FIMM133852	Capmatinib	1000		1.6	1000		0	1000		1.4	1000		0.8	1000		0	MET inhibitor	B. Kinase inhibitor	Investigational (Ph 2)	FIMM133852	Capmatinib	FIMM133852	Capmatinib
FIMM023806	Carboplatin	100000		2.4	6817.4		1.9	16789		5.2	16496.3		3.2	100000		0	Platinum-based antineoplastic agent	A. Conv. Chemo	Approved	FIMM023806	Carboplatin	FIMM023806	Carboplatin
FIMM000298	Celecoxib	10000		0	10000		0	10000		0.3	10000		0	10000		0	Selective COX-2 inhibitor	J. NSAID	Approved	FIMM000298	Celecoxib	FIMM000298	Celecoxib
FIMM133831	Ceritinib	2500		1.9	2500		0.9	332		2.4	376.1		2.1	2500		0	ALK inhibitor	B. Kinase inhibitor	Approved	FIMM133831	Ceritinib	FIMM133831	Ceritinib
FIMM023807	Cisplatin	37389.7		1	26556		3.6	30831.1		4.9	31435.2		3.8	37283.8		1.1	Platinum-based antineoplastic agent	A. Conv. Chemo	Approved	FIMM023807	Cisplatin	FIMM023807	Cisplatin
FIMM000396	Clomifene	10000		0	2803.1		2.2	2512.8		4.9	3106		3.2	10000		0	Selective estrogen receptor modulator	F. Hormone therapy	Approved	FIMM000396	Clomifene	FIMM000396	Clomifene
FIMM133824	Copanlisib	162		8.2	114		5.6	106.9		8.2	54.8		6.6	90.2		3.2	PI3K alpha, delta selective inhibitor	B. Kinase inhibitor	Investigational (Ph 2)	FIMM133824	Copanlisib	FIMM133824	Copanlisib
FIMM109464	Crenolanib	10000		0	3055.2		5.3	3141.6		5.2	2371.5		5.3	10000		1	PDGFRA and PDGFRB inhibitor	B. Kinase inhibitor	Investigational (Ph 2)	FIMM109464	Crenolanib	FIMM109464	Crenolanib
FIMM003713	Crizotinib	1000		1.4	1000		0.4	1000		0	1000		0	1000		0	ALK, c-Met inhibitor	B. Kinase inhibitor	Approved	FIMM003713	Crizotinib	FIMM003713	Crizotinib
FIMM000406	Cytarabine	10000		0	10000		1.3	10000		8	237		6.2	10000		0	Antimetabolite, interferes with DNA synthesis	A. Conv. Chemo	Approved	FIMM000406	Cytarabine	FIMM000406	Cytarabine
FIMM109459	Dacomitinib	1000		1.1	1000		0.1	15.9		12.5	96.9		2.7	1000		1.3	pan-HER inhibitor	B. Kinase inhibitor	Investigational (Ph 3)	FIMM109459	Dacomitinib	FIMM109459	Dacomitinib
FIMM023832	Dactolisib	1000		4.9	8.8		11.8	8.4		15.3	11		10.1	1000		2.9	mTOR/(PI3K) inhibitor	B. Kinase inhibitor	Investigational (Ph 2)	FIMM023832	Dactolisib	FIMM023832	Dactolisib
FIMM003775	Dasatinib	1000		0	1000		3.1	35.3		7.6	31		4.9	1000		0	Abl, Src, Kit, EphR... Inhibitor	B. Kinase inhibitor	Approved	FIMM003775	Dasatinib	FIMM003775	Dasatinib
FIMM003724	Decitabine	10000		0.5	10000		0	10000		0	10000		0	10000		0	Nucleoside analog DNA methyl transferase inhibitor	E. Differentiating/ epigenetic modifier	Approved	FIMM003724	Decitabine	FIMM003724	Decitabine
FIMM000914	Deferoxamine	10000		0	10000		1.1	2284.5		3.2	10000		0.6	10000		0	Iron chelator	X. Other	Approved (non-oncology)	FIMM000914	Deferoxamine	FIMM000914	Deferoxamine
FIMM000227	Dexamethasone	10000		0	10000		0	10000		0	10000		0	10000		0	Glucocorticoid, immunomodulatory agent	D. Immunomodulatory	Approved	FIMM000227	Dexamethasone	FIMM000227	Dexamethasone
FIMM003797	Docetaxel	1000		0	1000		6.1	4.6		12	4.4		7.4	1000		0	Mitotic inhibitor, taxane microtubule stabilizer	A. Conv. Chemo	Approved	FIMM003797	Docetaxel	FIMM003797	Docetaxel
FIMM003711	Dovitinib	10000		0	10000		0	10000		0	10000		0	10000		0	FGFR inhibitor	B. Kinase inhibitor	Investigational (Ph 3)	FIMM003711	Dovitinib	FIMM003711	Dovitinib
FIMM023818	Doxorubicin	1000		0	314.8		1.6	191		6.6	146		3.1	1000		0	Topoisomerase II inhibitor	A. Conv. Chemo	Approved	FIMM023818	Doxorubicin	FIMM023818	Doxorubicin
FIMM109456	Enzalutamide	10000		0	10000		0	10000		0	10000		0	10000		0	AR antagonist	F. Hormone therapy	Approved	FIMM109456	Enzalutamide	FIMM109456	Enzalutamide
FIMM001355	Epirubicin	1000		0	152.6		3.6	182.1		6.7	148		4.2	1000		0	Topoisomerase II inhibitor	A. Conv. Chemo	Approved	FIMM001355	Epirubicin	FIMM001355	Epirubicin
FIMM136549	Eribulin	1000		0	8.4		6.5	7.8		9.8	1000		6.3	1000		0	Mitotic inhibitor, microtubule depolymerizer.	A. Conv. Chemo	Approved	FIMM136549	Eribulin	FIMM136549	Eribulin
FIMM000183	Erlotinib	10000		4.3	10000		1.7	399.3		10.7	831.5		2.9	10000		1.6	EGFR inhibitor	B. Kinase inhibitor	Approved	FIMM000183	Erlotinib	FIMM000183	Erlotinib
FIMM023814	Etoposide	10000		0	10000		0.9	10000		2	10000		2.1	10000		0	Topoisomerase II inhibitor	A. Conv. Chemo	Approved	FIMM023814	Etoposide	FIMM023814	Etoposide
FIMM003755	Everolimus	100		0	100		3.2	1.2		7.7	100		2.4	100		0	binds FKBP12, causes inhibition of mTORC1	C. Rapalog	Approved	FIMM003755	Everolimus	FIMM003755	Everolimus
FIMM003593	Exemestane	10000		0	10000		0	10000		0	10000		0	10000		0	Aromatase inhibitor	F. Hormone therapy	Approved	FIMM003593	Exemestane	FIMM003593	Exemestane
FIMM000428	Finasteride	10000		0	10000		0	10000		0	10000		0	10000		0	type II 5-alpha reductase inhibitor	F. Hormone therapy	Approved	FIMM000428	Finasteride	FIMM000428	Finasteride
FIMM003777	Fingolimod	3578.3		4.2	3188		5.5	3256.1		5.4	3053.7		5.7	10000		0	S1PR antagonist	X. Other	Approved	FIMM003777	Fingolimod	FIMM003777	Fingolimod
FIMM023797	Floxuridine	10000		0	10000		0.6	1013.4		4	10000		1	10000		0	Antimetabolite; Analog of 5-fluorouracil	A. Conv. Chemo	Approved	FIMM023797	Floxuridine	FIMM023797	Floxuridine
FIMM023828	Fludarabine	10000		0	10000		0	10000		0.3	10000		0.5	10000		0	Antimetabolite; Purine analog	A. Conv. Chemo	Approved	FIMM023828	Fludarabine	FIMM023828	Fludarabine
FIMM000439	Fluorouracil	1000		0	10000		0	10000		1.1	10000		0	10000		0	Antimetabolite	A. Conv. Chemo	Approved	FIMM000439	Fluorouracil	FIMM000439	Fluorouracil
FIMM000446	Flutamide	10000		0	10000		0	10000		0	10000		0	10000		0	Nonsteroidal antiandrogen	F. Hormone therapy	Approved	FIMM000446	Flutamide	FIMM000446	Flutamide
FIMM000617	Fulvestrant	1000		0	1000		0	1000		0	1000		0	1000		0	Estrogen receptor antagonist	F. Hormone therapy	Approved	FIMM000617	Fulvestrant	FIMM000617	Fulvestrant
FIMM133857	Gedatolisib	100		0	90.2		2.4	25.7		14.2	25.8		6.7	1000		0	PI3K/mTOR inhibitor	B. Kinase inhibitor	Investigational (Ph 2))	FIMM133857	Gedatolisib	FIMM133857	Gedatolisib
FIMM023798	Gemcitabine	1000		0	45.9		4.4	1000		1.4	6.1		9.7	1000		0	Antimetabolite; Nucleoside analog	A. Conv. Chemo	Approved	FIMM023798	Gemcitabine	FIMM023798	Gemcitabine
FIMM000257	Goserelin	10000		0	10000		0	10000		0	10000		0	10000		0	Gonadotropin releasing hormone superagonist	F. Hormone therapy	Approved	FIMM000257	Goserelin	FIMM000257	Goserelin
FIMM003750	Idelalisib	10000		0.3	10000		0.4	10000		1.3	10000		0.1	10000		0.3	PI3K inhibitor, p110?-selective	B. Kinase inhibitor	Approved	FIMM003750	Idelalisib	FIMM003750	Idelalisib
FIMM000464	Imiquimod	2500		0	2500		0	2500		0	2500		0	2500		0	Immunomodulatory agent, TLR7 agonist	D. Immunomodulatory	Approved	FIMM000464	Imiquimod	FIMM000464	Imiquimod
FIMM023821	Ixabepilone	1000		0	368.1		0.9	129.6		2.9	362.3		0.9	1000		0	Mitotic inhibitor. Epothilone microtubule stabilizer.	A. Conv. Chemo	Approved	FIMM023821	Ixabepilone	FIMM023821	Ixabepilone
FIMM000274	Lapatinib	1000		0	1000		0	373.9		0.9	1000		0	1000		0	HER2, EGFR inhibitor	B. Kinase inhibitor	Approved	FIMM000274	Lapatinib	FIMM000274	Lapatinib
FIMM100377	Lasofoxifene	1000		0	1000		0	1000		0	1000		0	1000		0	Selective estrogen receptor modulator	F. Hormone therapy	Approved	FIMM100377	Lasofoxifene	FIMM100377	Lasofoxifene
FIMM003782	Lenalidomide	100000		0	100000		0	100000		0	100000		0	100000		0	Immunomodulatory	D. Immunomodulatory	Approved	FIMM003782	Lenalidomide	FIMM003782	Lenalidomide
FIMM133809	Lenvatinib	2500		0	2500		1.1	2500		0	2500		0	2500		0	VEGFR inhibitor	B. Kinase inhibitor	Approved (US)	FIMM133809	Lenvatinib	FIMM133809	Lenvatinib
FIMM000290	Letrozole	10000		0	10000		0	10000		0	10000		0	10000		0	Aromatase inhibitor	F. Hormone therapy	Approved	FIMM000290	Letrozole	FIMM000290	Letrozole
FIMM003772	Linsitinib	10000		0.3	10000		1.3	10000		0.1	10000		0.5	10000		0.5	IGF1R, IR inhibitor	B. Kinase inhibitor	Investigational (Ph 2)	FIMM003772	Linsitinib	FIMM003772	Linsitinib
FIMM133786	Lonafarnib	26298.6		6.6	16666.8		9	12507.4		10	16227.1		9.1	20619.2		7.8	Farnesyl transferase inhibitor	E. Differentiating/ epigenetic modifier	Investigational (Ph 3)	FIMM133786	Lonafarnib	FIMM133786	Lonafarnib
FIMM000618	Megestrol acetate	10000		0	10000		1	3268.4		2.5	3964.5		0.8	10000		0	Progestogen	F. Hormone therapy	Approved	FIMM000618	Megestrol acetate	FIMM000618	Megestrol acetate
FIMM000649	Methotrexate	5000		0	5000		0	5000		0	5000		0	5000		0	Antimetabolite; Anti-folate agent	H. Metabolic modifier	Approved	FIMM000649	Methotrexate	FIMM000649	Methotrexate
FIMM000484	Methylprednisolone	10000		0	10000		0	10000		0	10000		0	10000		0	Glucocorticoid, immunomodulatory agent	D. Immunomodulatory	Approved	FIMM000484	Methylprednisolone	FIMM000484	Methylprednisolone
FIMM000490	Mitoxantrone	1000		4.8	33.1		4.8	162.7		6	148.6		3.9	1000		0	Topoisomerase II inhibitor	A. Conv. Chemo	Approved	FIMM000490	Mitoxantrone	FIMM000490	Mitoxantrone
FIMM136419	Molibresib	10000		0	10000		2.2	363.8		12	1054.9		2.4	10000		0	BET family inhibitor	E. Differentiating/ epigenetic modifier	Investigational (Ph 1)	FIMM136419	Molibresib	FIMM136419	Molibresib
FIMM109441	Momelotinib	10000		0	827.4		1.9	1519.7		6.5	1449.3		3.4	1580.4		1.9	JAK1 & 2 inhibitor	B. Kinase inhibitor	Investigational (Ph 2)	FIMM109441	Momelotinib	FIMM109441	Momelotinib
FIMM136537	Motolimod	10000		0	10000		0.1	10000		0	10000		0	10000		0	TLR8 agonist	D. Immunomodulatory	Investigational (Ph 2)	FIMM136537	Motolimod	FIMM136537	Motolimod
FIMM136507	Napabucasin	671.1		6.7	3243		8.4	647		17.6	2332.7		10.9	4806.5		6.3	CSC inhibitor, STAT3 mediated	X. Other	Investigational (Ph 3)	FIMM136507	Napabucasin	FIMM136507	Napabucasin
FIMM003707	Navitoclax	1758.1		4.4	10000		0	10000		3.9	10000		0	10000		0.4	Bcl-2/Bcl-xL inhibitor	G. Apoptotic modulator	Investigational (Ph 2)	FIMM003707	Navitoclax	FIMM003707	Navitoclax
FIMM100374	Niraparib	10000		0.1	10000		0.4	10000		1.3	10000		1.7	10000		0	PARP inhibitor	E. Differentiating/ epigenetic modifier	Approved (US)	FIMM100374	Niraparib	FIMM100374	Niraparib
FIMM133892	NVP-LCL161	25000		0.4	25000		0.8	3371.5		3.8	25000		0.3	25000		0	IAPs, SMAC mimetic	G. Apoptotic modulator	Investigational (Ph 2)	FIMM133892	NVP-LCL161	FIMM133892	NVP-LCL161
FIMM136530	ODM-201	2500		0	2500		0	2500		0.7	2500		0	2500		0	AR antagonist	F. Hormone therapy	Investigational (Ph 3)	FIMM136530	ODM-201	FIMM136530	ODM-201
FIMM100379	Omacetaxine	10000		0	142.8		11.5	162.1		19.9	421		9.7	10000		0.5	Protein synthesis inhib (80 S ribosome)	A. Conv. Chemo	Approved	FIMM100379	Omacetaxine	FIMM100379	Omacetaxine
FIMM100414	Omipalisib	41		7	9.8		13.4	10.8		18.8	11.2		11.9	11.2		7.9	PI3K/mTOR inhibitor	B. Kinase inhibitor	Investigational (Ph 1)	FIMM100414	Omipalisib	FIMM100414	Omipalisib
FIMM136398	Osimertinib	2500		0.2	410.1		2.5	272.9		8.6	247.4		3.7	2500		0	EGFR(L858R/T790M) inhibitor	B. Kinase inhibitor	Approved	FIMM136398	Osimertinib	FIMM136398	Osimertinib
FIMM000491	Paclitaxel	1000		0	12.7		4.3	2.1		13.3	3.5		7.9	1000		0	Mitotic inhibitor, taxane microtubule stabilizer	A. Conv. Chemo	Approved	FIMM000491	Paclitaxel	FIMM000491	Paclitaxel
FIMM003705	Palbociclib	1000		0	2863		1.2	380.5		4.2	2216.8		1.5	10000		0.1	CDK4/6 inhibitor	B. Kinase inhibitor	Approved	FIMM003705	Palbociclib	FIMM003705	Palbociclib
FIMM003784	Pazopanib	10000		0	10000		0	10000		0	10000		0.2	10000		0	VEGFR inhibitor	B. Kinase inhibitor	Approved	FIMM003784	Pazopanib	FIMM003784	Pazopanib
FIMM115472	Pevonedistat	10000		0	772.1		4.1	705.4		7.1	492		5.5	10000		0	NAE inhibitor	H. Metabolic modifier	Investigational (Ph 1)	FIMM115472	Pevonedistat	FIMM115472	Pevonedistat
FIMM003792	Pictilisib	276		9.1	999.3		6.5	628.3		9.5	568.1		7.4	995.2		3.7	PI3K inhibitor, pan-class I	B. Kinase inhibitor	Investigational (Ph 2)	FIMM003792	Pictilisib	FIMM003792	Pictilisib
FIMM136553	Pirfenidone	3402.3		4.1	10000		0	10000		0	10000		0	10000		0	Antifibrotic and anti-inflammatory	D. Immunomodulatory	Approved	FIMM136553	Pirfenidone	FIMM136553	Pirfenidone
FIMM003766	Plerixafor	10000		0	10000		0	10000		0	10000		0	10000		0	CXCR4 antagonist	X. Other	Approved	FIMM003766	Plerixafor	FIMM003766	Plerixafor
FIMM003730	Ponatinib	1000		0	312.1		1.4	394.8		1.6	216.7		1.6	1000		0	Broad TK inhibitor	B. Kinase inhibitor	Approved	FIMM003730	Ponatinib	FIMM003730	Ponatinib
FIMM000519	Prednisolone	10000		0	10000		0	10000		0	10000		0.4	10000		0	Glucocorticoid, immunomodulatory agent	D. Immunomodulatory	Approved	FIMM000519	Prednisolone	FIMM000519	Prednisolone
FIMM000262	Raloxifene	10000		0	10000		1.2	1034.4		3.9	1477.9		3.3	10000		0	Selective estrogen receptor modulator	F. Hormone therapy	Approved	FIMM000262	Raloxifene	FIMM000262	Raloxifene
FIMM100397	Ridaforolimus	100		0	1.5		4.9	0.4		13.1	0.8		6	100		0	binds FKBP12, causes inhibition of mTORC1	C. Rapalog	Investigational (Ph 3)	FIMM100397	Ridaforolimus	FIMM100397	Ridaforolimus
FIMM133807	Rigosertib	10000		0	36.1		7	30.2		12.2	46.7		7.6	10000		0	Ras-Raf interaction inhibitor, contaminated by microtubile depolymerizer...	X. Other	Investigational (Ph 3)	FIMM133807	Rigosertib	FIMM133807	Rigosertib
FIMM133902	Selinexor	10000		0	89.9		7.6	65.3		18.8	41.7		8.2	10000		0	XPO1/CRM1 inhibitor	G. Apoptotic modulator	Investigational (Ph 2)	FIMM133902	Selinexor	FIMM133902	Selinexor
FIMM136552	Selonsertib	1000		0	1000		0	1000		0	1000		0	1000		0	ASK1 inhibitor	B. Kinase inhibitor	Investigational (Ph 2)	FIMM136552	Selonsertib	FIMM136552	Selonsertib
FIMM003708	Selumetinib	10000		0	10000		0.1	74.2		15.3	10000		2.3	10000		0	MEK1/2 inhibitor	B. Kinase inhibitor	Investigational (Ph 3)	FIMM003708	Selumetinib	FIMM003708	Selumetinib
FIMM133886	Silmitasertib	10000		1.5	1656.1		3.6	1365		8	1342.4		6.1	1150.7		3.2	CSNK2A1 inhibitor	B. Kinase inhibitor	Investigational (Ph 2)	FIMM133886	Silmitasertib	FIMM133886	Silmitasertib
FIMM023795	Sirolimus	100		0	100		3.5	0.9		9.5	6.2		2.9	100		0	binds FKBP12, causes inhibition of mTORC1	C. Rapalog	Approved	FIMM023795	Sirolimus	FIMM023795	Sirolimus
FIMM003794	Sorafenib	1000		0	1000		0	1000		0	1000		0	1000		0	B-Raf, FGFR-1, VEGFR-2 & -3, PDGFR-beta, KIT, and FLT3 inhib	B. Kinase inhibitor	Approved	FIMM003794	Sorafenib	FIMM003794	Sorafenib
FIMM023820	Sunitinib	1000		0	1000		0.3	1000		0	1000		0.5	1000		0	Broad TK inhibitor	B. Kinase inhibitor	Approved	FIMM023820	Sunitinib	FIMM023820	Sunitinib
FIMM001244	Tacrolimus	10000		0	10000		0	10000		1	10000		0	10000		0	Binds FKBP12, causes inhibition of calcineurin	C. Rapalog	Approved	FIMM001244	Tacrolimus	FIMM001244	Tacrolimus
FIMM000620	Tamoxifen	10000		0	3004.2		1.1	3248.5		3.1	2205.5		2.2	10000		0	Estrogen receptor antagonist	F. Hormone therapy	Approved	FIMM000620	Tamoxifen	FIMM000620	Tamoxifen
FIMM003786	Temsirolimus	100		0	0.7		6.9	0.6		12.1	100		5.4	100		0	binds FKBP12, causes inhibition of mTORC1	C. Rapalog	Approved	FIMM003786	Temsirolimus	FIMM003786	Temsirolimus
FIMM000556	Topotecan	10000		0	1004.4		5.5	1470.1		7.6	233.5		7.3	1880.8		1.8	Topoisomerase I inhibitor. Camptothecin analog	A. Conv. Chemo	Approved	FIMM000556	Topotecan	FIMM000556	Topotecan
FIMM100376	Toremifene	10000		0	1736.5		2.6	2537.8		3.5	3611.9		1.9	10000		0.3	selective estrogen receptor modulator	F. Hormone therapy	Approved	FIMM100376	Toremifene	FIMM100376	Toremifene
FIMM003751	Trametinib	12.5		3.5	250		1.3	1.7		15.2	250		3.8	250		0.6	MEK1/2 inhibitor	B. Kinase inhibitor	Approved	FIMM003751	Trametinib	FIMM003751	Trametinib
FIMM136493	Ulixertinib	10000		0	10000		1.6	306.5		8.5	10000		3.5	10000		0	ERK inhibitor	B. Kinase inhibitor	Investigational (Ph 2)	FIMM136493	Ulixertinib	FIMM136493	Ulixertinib
FIMM109448	Varespladib	10000		0	10000		0	10000		0	10000		0	10000		0	Secretory phospholipase A2 inhibitor	X. Other	Investigational (Ph 2)	FIMM109448	Varespladib	FIMM109448	Varespladib
FIMM003767	Vemurafenib	10000		0	1142.5		3.2	3295.9		2.2	1368.6		3	10000		0	B-Raf(V600E) inhibitor	B. Kinase inhibitor	Approved	FIMM003767	Vemurafenib	FIMM003767	Vemurafenib
FIMM115484	Venetoclax	1000		0	1000		0	1000		0	1000		0	1000		0	Bcl-2-selective inhibitor	G. Apoptotic modulator	Approved (US)	FIMM115484	Venetoclax	FIMM115484	Venetoclax
FIMM000370	Vinblastine	1000		0	71.3		2.7	79.3		4	109.9		3	1000		0	Mitotic inhibitor. Vinca alkaloid microtubule depolymerizer	A. Conv. Chemo	Approved	FIMM000370	Vinblastine	FIMM000370	Vinblastine
FIMM000337	Vincristine	1000		0	55		3.2	36.2		7.6	116.2		3	1000		0	Mitotic inhibitor. Vinca alkaloid microtubule depolymerizer	A. Conv. Chemo	Approved	FIMM000337	Vincristine	FIMM000337	Vincristine
FIMM136590	Vinflunine	1000		0	1000		0	146.5		2.4	194.6		1.9	1000		0	Mitotic inhibitor. Vinca alkaloid microtubule depolymerizer	A. Conv. Chemo	Approved	FIMM136590	Vinflunine	FIMM136590	Vinflunine
FIMM000344	Vinorelbine	7.4		9.3	75.9		7.7	45.6		14.9	37.2		8.6	10000		0	Mitotic inhibitor. Vinca alkaloid microtubule depolymerizer	A. Conv. Chemo	Approved	FIMM000344	Vinorelbine	FIMM000344	Vinorelbine
FIMM100375	Volasertib	1000		0.1	1000		2.1	86.1		5.8	120.5		2.2	1000		0.2	PLK1 inhibitor	B. Kinase inhibitor	Investigational (Ph 3)	FIMM100375	Volasertib	FIMM100375	Volasertib
FIMM003787	Vorinostat	10000		0	1884.8		1.7	1519.9		5.9	1385.1		4.3	10000		0	HDAC inhibitor	E. Differentiating/ epigenetic modifier	Approved	FIMM003787	Vorinostat	FIMM003787	Vorinostat

## Sheet: Table_S1f
REAGENT or RESOURCE	SOURCE	IDENTIFIER	Stock concentration	Dilution used
Antibodies IF
Anti-Carbonic Anhydrase 9/CA9 antibody	Abcam	ab10471	0.5mg/ml	0.111111
Vimentin (D21H3) XP® Rabbit mA	Cell Signaling	5741	N/A	0.111111
Monoclonal Mouse Anti-Human p53 Protein	Dako	M7001	237 mg/ml	0.111111
PAX8 Polyclonal antibody	Proteintech	10336-1-AP	35ug/ml	0.111111
Hoechst 33242	Life Technologies	H1399	10 mg/mL	3.51389
Antibodies IHC			Stock conc.	Dilution used
CD3e Monoclonal Antibody (EP449E)	Invitrogen, USA	MA5-14482		0.5625
Recombinant Anti-LAG-3 antibody	Abcam	180187	0.474 mg/ml	0.736111
TIM-3 (D5D5R™) XP® Rabbit mAb	Cell Signalling	45208		0.111111
PathPlusTM Monoclonal Mouse anti‑Human PDCD1	LSBio	LS-B12784	1 mg/ml	0.111111
PDGF Receptor β (28E1) Rabbit mAb	Cell Signalling	3169		0.111111
Anti-Collagen I antibody	Abcam	ab34710	1 mg/ml	0.180556
Monoclonal Mouse Anti-Vimentin	Dako	M0725	156 mg/L	0.319444
Carbonic Anhydrase IX/CA9 Antibody	Novus	NB100-417	10mg/ml	0.25
Recombinant Anti-CD14 antibody	Abcam	ab133335	0.083mg/ml	1.43056
Recombinant Anti-CD163 antibody [EPR14643] - C-terminal	Abcam	ab188571	0.408mg/ml	0.180556
Recombinant Anti-PAX8 antibody [EPR13510]	Abcam	ab181054	1.023mg/ml	0.736111
Biological samples
Chemicals, peptides, and recombinant proteins
CellTiter-Glo 2.0,#G9243, Promega, USA	Promega, USA	G9243
Dispase II	Thermo Fisher Scientific	17105041
Advanced DMEM:F12	Thermo Fisher Scintific	12634010
GlutaMAX	Thermo Fisher Scintific	35050038
HEPES	Thermo Fisher Scintific	15630056
Primocin	Invivogen	ant-pm-2
B-27 Supplement	Gibco	17504044
Nicotinamide	Sigma	N0636-100G
N-acetylcysteine	Sigma	A9165
Gastrin	Tocris	3006
A83-01	Sigma	SML0788
hEGF	Peprotech	AF-100-15
hFGF-10	Peprotech	100-26
hNoggin	Peprotech	120-10C
Y-27632	Tocris	1254
BSA solution 30% in DPBS	Sigma	A9576-50ML
Collagenase XI	Sigma	C9407-1G
FBS	Thermo Fisher Scintific	10500064
Penicillin/Streptomycin	Thermo Fisher Scintific	15140122
DMEM, high glucose, GlutaMAX	Thermo Fisher Scintific	31966021
F-12 nutrien mixture (HAM)-DMEM	Thermo Fisher Scientific, Gibco, USA	#2176-039
FBS	Thermo Fisher Scientific, Gibco, USA	#10270
Cholera toxin	Sigma/Merck	#C8052
Hydrocortisone	Sigma/Merck	# H0396
EGF	Corning, USA	#354052
Insulin human	Sigma/Merck	# I9278
Rock inhbitor, Y-27632 dihydrochloride	Enzo Life Sciences, USA	ALX-270-333-
FGF	Invitrogen, Gibco, USA	#PHG0026
Insulin from bovine pancreas	Sigma/Merck	# I0516
Adenine	Sigma/Merck	# A2786
Primocin	Invitrogen, Gibco, USA	# ant-pm-1
TrypLE Express	Thermo Fisher Scientific, Gibco, USA	12605028
Matrigel® Matrix	Corning	356231
DNAse I	Sigma	D5025
STEMdiff™ Apell™	StemCell Technology	5270
Corning® Cell Recovery Solution	Corning	354253
Tryple Express*	Corning	#12605036
Corning® 384 well microplate, low flange	Corning	3764
Rbt HRP Bright-Vision	ImmunoLogic	DPVR55HRP		01:05:00
ms HRP Bright-Vision	ImmunoLogic	M50HRP		01:05:00
Hydrogen peroxide	Life technologies	T30955
TSA488	Invitrogen	B40953		0.111111
TSA555	Invitrogen	B40955		0.111111
AF647 rbt	Invitrogen	A21245
AF750 ms	Invitrogen	A21037
DAPI	Roche	10236276001	10mg/ml	4.20833
Bright DAP	Immunologic	BS04-110	10mg/ml
Hematoxylin	Dako/agilent	CS70030-2
Goat Serum	Gibco	16210-064
Tris base	Fisher scientific	BP152-5
Ethylenediaminetetraacetic acid	Sigma	ED-500G
Tween	Fisher scientific	BP337-100
ProLong Gold	Invitrogen	P36934
Tissue-Tek glas mounting medium	Sakura	1467N
Xylenes	Honeywell	534056-46
Paraformaldehyde	Sigma-Aldrich	P6148-1kg
PBS tablets	Medicago	09-9400-100
Tween 20 %	Sigma	P9416-100ML
BSA (Bovine Serum Albumin)	Biowest	P6154-100G
Triton-X	Sigma	T8787-100ML
AF568 goat anti-mouse	Invitrogen	A11004	2mg/ml	0.736111
Alexa-Fluor 488 goat anti-rabbit	Invitrogen	A11008	2mg/ml	0.736111
Cellcarrier ultra (PE) 384 imaging plates	Perkin Elmer	6057302
Recovery cell culture freezing medium	Thermo Fisher	12648010
Critical commercial assays
Shandon cytoblock, cell preparation system	ThermoFisher, USA
Dneasy Blood &Tissue kit	Qiagen	69506
Twist Human Core Exome EF Multiplex Complete kit	Twist Bioscience	PN 100803
Adapters	Integrated DNA Technologies
LabChip GX Touch HT High Sensitivity assay	Perkin Elmer
Twist Human RefSeq Panel	Twist Bioscience
Deposited data
Experimental models: Cell lines
L WNT3a cells	ATCC	CRL-2647
HA-R-Spondin1-Fc 293T cells	Trevigen	3710-001-01
Oligonucleotides
Recombinant DNA
Software, equipment, and algorithms
NovaSeq	Illumina
PHERAstar FS (DSRT luminesence measurement)	ORDIOR, BMG LABTECH
BioTek MultiFlo FX dispenser	Biotek
EL406 -plate washer/dispenser	Biotek
Echo 525 -acoustic dispenser	Labcyte
Zeiss Azio Scan Z.1	Carl Zeiss NTS Ltd.
Therapeutic Target Database	Bioinformatics & Drug Design group [BIDD]
Breeze	FIMM-UH in-house analytics tool
Burrows-Wheeler Aligner (BWA)	GLP
BaseRecalibrator	GATK team
MarkDuplicates	Picard
IndelRealigner	GATK team
Mpileup	SAMTOOLS package
CopyCat tool	Chris Miller, GitHub
MSigDB Database	Broad Institute
GSEA	Bioconductor
FindMarkers	Seurat
ComplexHeatmap v2.15.1	Bioconductor
circlize v0.4.15	RCAN
ggpubr v0.6.0	RCAN
ggplot2 v3.4.1	RCAN
MTB Portal	Karolinska institutet
PCGR	Sigve Nakken (github)
Intervar	WGLab
CPSR	Sigve Nakken (github)
